# Supplementary material for: Simultaneous extraction, separation and purification of microbial genomic DNA and total RNA from acidic habitat samples
Source: Royal Society of Chemistry journal article supplement (doi:10.1039/c4ay01608d), 2014-11-25
Supplement: c4ay01608d1.pdf [file c4ay01608d1.pdf]

## Supplementary material

**Article name:** Simultaneous Extraction, Separation and Purification of Microbial Genomic DNA and Total RNA from Acidic Habitat Samples

**Running title:** Simultaneous Recovery of Microbial DNA and RNA

## **A. Supporting tables**

**Table S1** Nucleic acid separated by different concentration of LiCl.

**Table S2** DNA and RNA separated at different initial nucleic acid concentration by using saturated LiCl.

## **B. Supporting figures**

**Figure S1** Simultaneous extraction of DNA and RNA from *A.f* by using four different pH PIPES buffer.

**Figure S2** Simultaneous extraction of DNA and RNA from *A.f* by using different amount of proteinase K.

**Figure S3** Linear relationship between nucleic acid amount and biomass.

**Figure S4** Nucleic acid precipitated at different temperature by saturated LiCl solution.

**Figure S5** Flow chart of the optimized protocol for the simultaneous recovery of DNA and RNA.

**Table S1 Nucleic acid separated by different concentration of LiCl.**

| LiCl      | DNA                     |                 |                 | RNA                     |                 |                 |
|-----------|-------------------------|-----------------|-----------------|-------------------------|-----------------|-----------------|
|           | Amount( $\mu\text{g}$ ) | $A_{260/280}$   | $A_{260/230}$   | Amount( $\mu\text{g}$ ) | $A_{260/280}$   | $A_{260/230}$   |
| 10M       | 10.4 $\pm$ 0.2          | 2.17 $\pm$ 0.01 | 2.33 $\pm$ 0.02 | 9 $\pm$ 1               | 1.89 $\pm$ 0.04 | 1.33 $\pm$ 0.03 |
| 12.5M     | 7.2 $\pm$ 0.3           | 2.03 $\pm$ 0.02 | 2.08 $\pm$ 0.01 | 11.8 $\pm$ 0.3          | 1.99 $\pm$ 0.02 | 1.57 $\pm$ 0.01 |
| 15M       | 4.10 $\pm$ 0.05         | 1.96 $\pm$ 0.04 | 1.96 $\pm$ 0.03 | 13.65 $\pm$ 0.01        | 2.06 $\pm$ 0.01 | 1.71 $\pm$ 0.00 |
| 17.5M     | 2.7 $\pm$ 0.1           | 2.19 $\pm$ 0.04 | 2.42 $\pm$ 0.02 | 17.1 $\pm$ 0.3          | 2.01 $\pm$ 0.01 | 1.76 $\pm$ 0.02 |
| Saturated | 3.9 $\pm$ 0.1           | 1.92 $\pm$ 0.02 | 1.61 $\pm$ 0.02 | 22.50 $\pm$ 0.05        | 2.04 $\pm$ 0.01 | 1.76 $\pm$ 0.01 |

**Table S2 DNA and RNA separated at different initial nucleic acid concentration by using saturated LiCl.**

| Conc. Of initial nucleic acid/ $\text{ng} \cdot \mu\text{L}^{-1}$ | DNA                     |                 |                 | RNA                     |                 |                 |
|-------------------------------------------------------------------|-------------------------|-----------------|-----------------|-------------------------|-----------------|-----------------|
|                                                                   | Amount( $\mu\text{g}$ ) | $A_{260/280}$   | $A_{260/230}$   | Amount( $\mu\text{g}$ ) | $A_{260/280}$   | $A_{260/230}$   |
| 100                                                               | 1.5 $\pm$ 0.2           | 1.85 $\pm$ 0.01 | 2.1 $\pm$ 0.1   | 1.6 $\pm$ 0.1           | 2 $\pm$ 0.1     | 2 $\pm$ 1       |
| 200                                                               | 2.99 $\pm$ 0.08         | 1.81 $\pm$ 0.03 | 1.76 $\pm$ 0.02 | 4.47 $\pm$ 0.08         | 2.02 $\pm$ 0.03 | 1.9 $\pm$ 0.2   |
| 400                                                               | 4.1 $\pm$ 0.1           | 1.96 $\pm$ 0.02 | 1.96 $\pm$ 0.02 | 13.6 $\pm$ 0.8          | 1.96 $\pm$ 0.01 | 1.71 $\pm$ 0.07 |
| 600                                                               | 7.9 $\pm$ 0.1           | 1.93 $\pm$ 0.04 | 1.7 $\pm$ 0.2   | 16.15 $\pm$ 0.02        | 1.97 $\pm$ 0.01 | 1.72 $\pm$ 0.01 |
| 800                                                               | 12.1 $\pm$ 0.2          | 1.96 $\pm$ 0.01 | 1.68 $\pm$ 0.06 | 24 $\pm$ 1              | 1.96 $\pm$ 0.01 | 1.76 $\pm$ 0.01 |
| 1000                                                              | 17.5 $\pm$ 0.3          | 1.82 $\pm$ 0.01 | 2.63 $\pm$ 0.00 | 28 $\pm$ 2              | 1.96 $\pm$ 0.00 | 1.73 $\pm$ 0.01 |

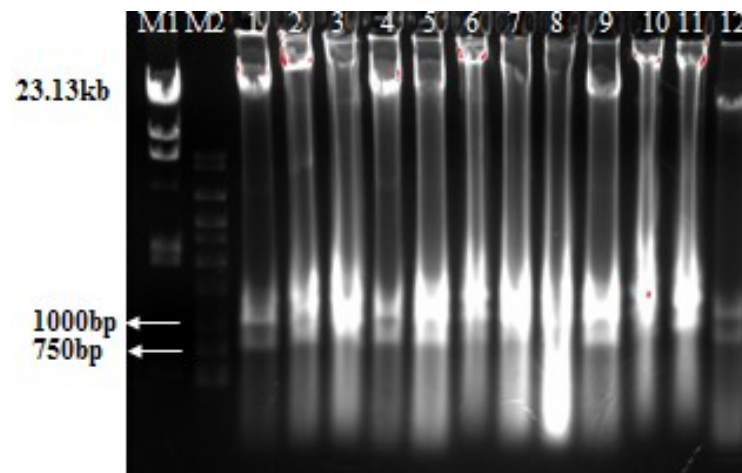

**Figure S1 Simultaneous extraction of DNA and RNA from *A.f* by using four different pH PIPES buffer.**

Lane M1: Hind III-cut bacteriophage lambda molecular size marker (200 ng); Lane M2: 1 kb marker; Lane 1,5,9: nucleic acid extracted by pH 6.0 PIPES buffer; Lane 2,6,10: nucleic acid extracted by pH 6.5 PIPES buffer; Lane 3,7,11: nucleic acid extracted by pH 7.0 PIPES buffer; Lane 4,8,12: nucleic acid extracted by pH 7.5 PIPES buffer.

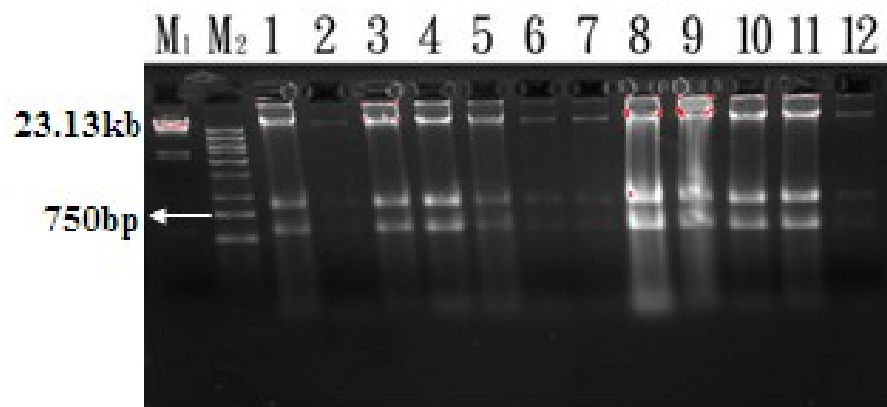

**Figure S2 Simultaneous extraction of DNA and RNA from *A.f* by using different amount of proteinase K.**

Lane M1: Hind III-cut bacteriophage lambda molecular size marker (200 ng); Lane M2: 1 kb marker; Lane 1,5,9: nucleic acid extracted without adding proteinase K; Lane 2,6,10: nucleic acid extracted by adding 0.61mg proteinase K; Lane 3,7,11: nucleic acid extracted by adding 3.05mg proteinase K; Lane 4,8,12: nucleic acid extracted by adding 6.10 mg proteinase K.

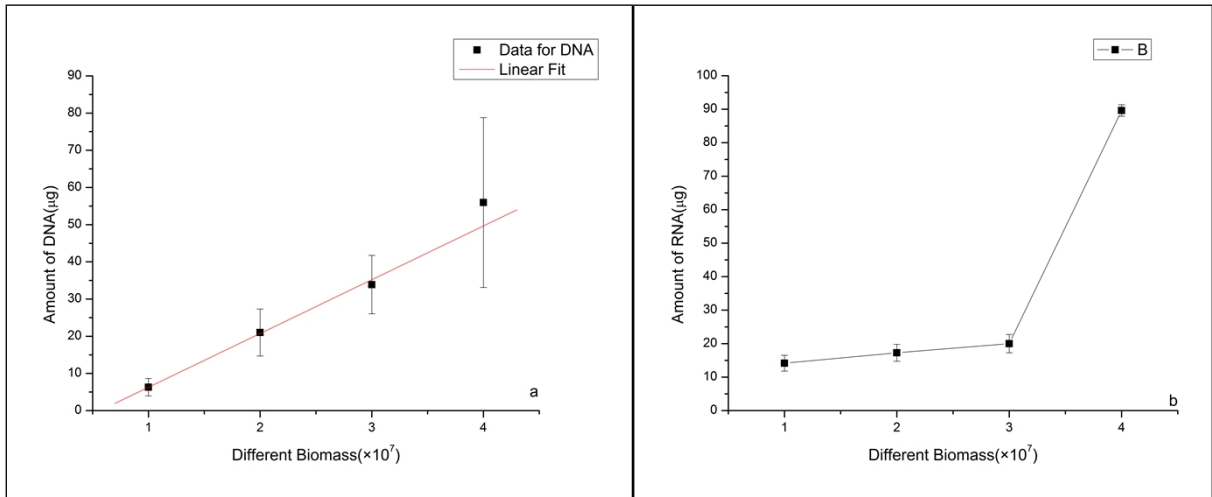

**Figure S3 Linear relationship between recovered nucleic acid amount and biomass.** (a) Linear relationship between DNA amount and biomass,  $Y=(0.14\pm 0.03)X - 8.18(\pm 4.77)$ , ( $R=0.997$ ,  $p=0.0074$ ); (b) Linear analysis for RNA amount and biomass.

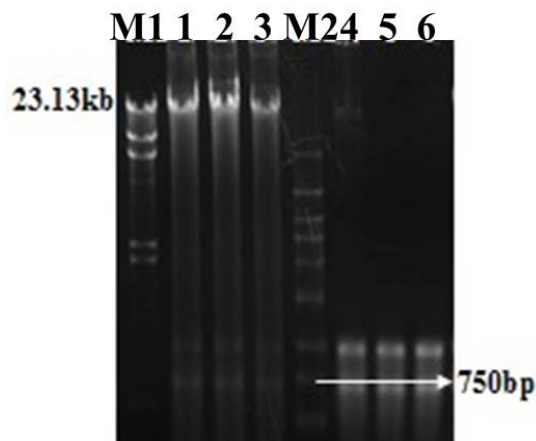

**Figure S4 Nucleic acid precipitated at different temperature by saturated LiCl solution.** Lane M1: Hind III-cut bacteriophage lambda molecular size marker (200 ng); Lane M2: 1 kb marker; Line 1-3: gDNA precipitated at 4 °C, -20 °C and -80 °C by 0.6 V isopropanol; Line 4-5: Total RNA precipitated at 4 °C, -20 °C and -80 °C by saturated LiCl solution.

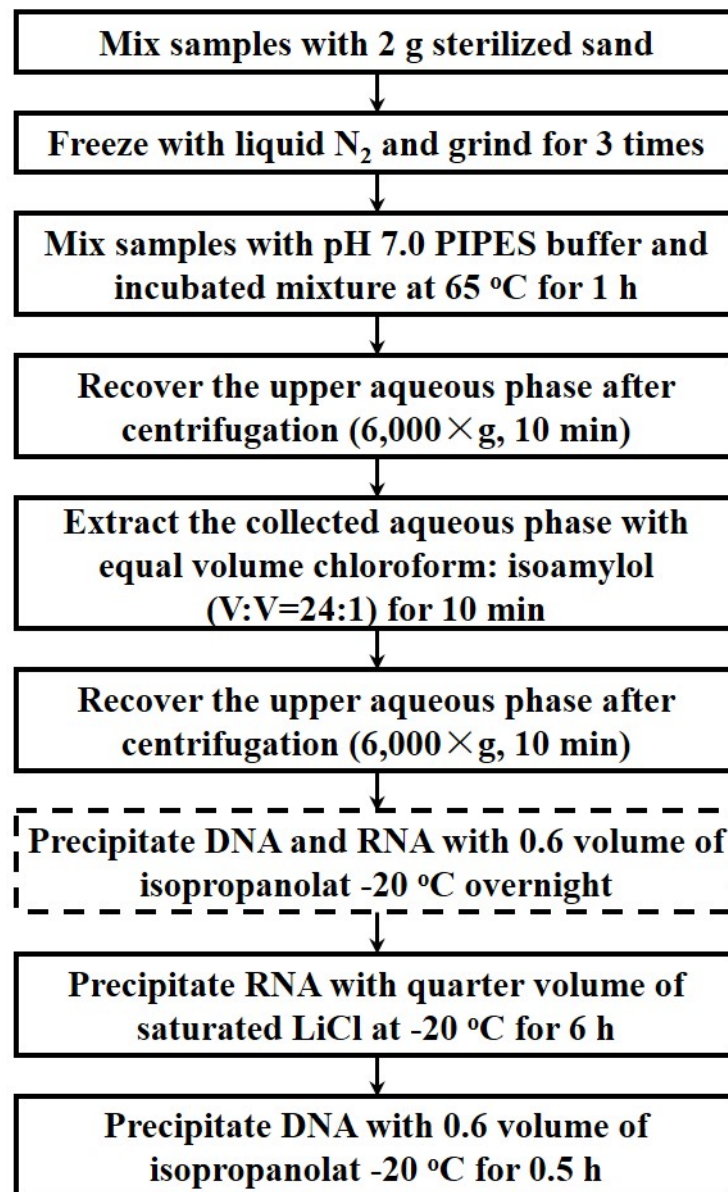

**Figure S5** Flow chart of the optimized protocol for the simultaneous recovery of DNA and RNA. Note: Dotted border step could be ignored if the quantity of total nucleic acid was not concerned.
